# Supplementary material
Source: publisher figshare collection journal article supplement (https://gsapubs.figshare.com/ndownloader/files/38066763)
Supplement: Supplementary file 1 [file 38066763]

## Sheet: Sheet1
TABLE S2. CORRELATION OF EL KEF CORES TO ODP SITE 1262 USING FE MAXIMA
El Kef age: Option 1 (PF* model)	El Kef age: Option 2 (CN model)	ODP 1262 age (Westerhold et al., 2020)	ODP 1262 age (Westerhold et al., 2020 +cycle counts; this study)	Tie
(Ma)	(Ma)	(Ma)	(Ma)
62.6		62.6	62.6	BioStrat
64.417		64.332	64.332	Pal7
64.962	64.742	64.942	64.942	Pal6
65.272		65.253	65.253	Pal5
65.485		65.434	65.434	Pal4
65.76	65.689	65.716	65.716	Pal3
65.954	65.9	65.835	65.835	Pal2
66.002	66.002	65.93	65.93	Pal1
66.022	66.022	66.022	66.022	K/Pg
66.05	66.05	66.076	66.0562	Maa1
66.072	66.072	66.113	66.0733	Maa2
66.112	66.112	66.15	66.0968	Maa3
66.145	66.145	66.179	66.1209	Maa4
66.17	66.17	66.197	66.1377	Maa5
Note: Fe maxima derived from X-ray fluorescence (XRF) Fe area count data
*PF= Planktic foraminifer
†CN= Calcareous nannoplankton
